# Supplementary material for: Cross-Reactive T Cell Response Exists in Chronic Lymphocytic Choriomeningitis Virus Infection upon Pichinde Virus Challenge
Source: MDPI journal article supplement (doi:10.3390/v14102293), 2022-10-18
Supplement: s1 [file s1]

**Table S1.** Antibodies for flow cytometric staining.

| <b>Antibody</b>                                                 | <b>Company</b>                            | <b>Identifier</b> |
|-----------------------------------------------------------------|-------------------------------------------|-------------------|
| Rat Anti-CD4-PeCy7-conjugated<br>(clone RM4-5)                  | eBioscience<br>(Hatfield, United Kingdom) | 100528            |
| Rat Anti-CD8a-BV650-conjugated<br>(clone 53-6.7)                | Biolegend<br>(San Diego, USA)             | 100741            |
| Rat Anti-CD8a-APCFire conjugated<br>(clone 53-6.7)              | Biolegend                                 | 100766            |
| Rat Anti-CD8a-APC eFl. 780 conjugated<br>(clone 53-6.7)         | eBioscience                               | 47-0081-82        |
| Rat Anti-CD44-BV510 conjugated<br>(clone IM7)                   | Biolegend                                 | 103044            |
| Rat Anti-CD62L-PerCP Cy5.5 conjugated<br>(clone MEL-14)         | Biolegend                                 | 104432            |
| Rat Anti-CD127-BV650 conjugated<br>(clone A7R34)                | Biolegend                                 | 135043            |
| Rat Anti-EOMES-eFluor610 conjugated<br>(clone Dan11mag)         | Invitrogen<br>(Waltham, USA)              | 61-4875-82        |
| Rat Anti-IFN $\gamma$ -BV605 conjugated<br>(clone XM61.2)       | Biolegend                                 | 505840            |
| Rat Anti-Ki67-PeCy7 conjugated<br>(clone 16A8)                  | Biolegend                                 | 652425            |
| Syrian Hamster Anti-KLRG1-BV785 conjugated<br>(clone 2F1/KLRG1) | Biolegend                                 | 138429            |
| Rat Anti-PD1-BV421 conjugated<br>(clone 29F.1A12)               | Biolegend                                 | 135221            |
| Mouse Anti-Tbet-BV711 conjugated<br>(clone 4B10)                | Biolegend                                 | 644820            |
| Rat Anti-TNF $\alpha$ -PeCy5 conjugated<br>(clone MP6-XT22)     | Biolegend                                 | 506322            |

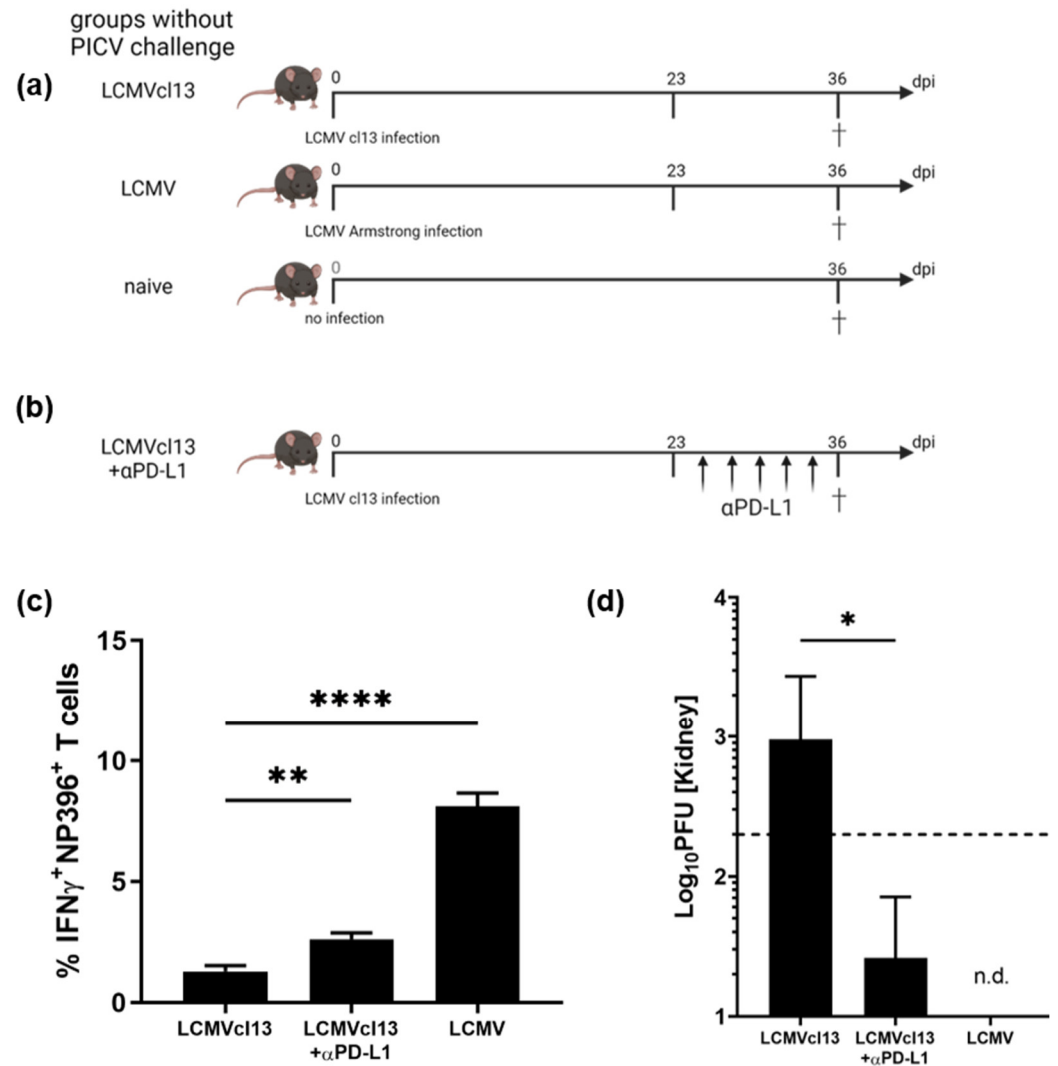

**Figure S1.** Checkpoint inhibitor therapy in LCMVcl13 infected mice resulted in increased LCMV NP396-specific T cell response and decreased LCMV load. (a) Experimental setup: Age-matched C57Bl/6 mice were infected with LCMV clone 13 (LCMVcl13), with LCMV Armstrong (LCMV) or kept naive (naive) without sequential PICV infection. (b) One group of LCMVcl13 mice was treated with  $\alpha$ PD-L1 antibody (LCMVcl13+ $\alpha$ PD-L1). (c) Frequency of IFN $\gamma$ <sup>+</sup> CD8<sup>+</sup> T cells after stimulation with LCMV NP396 peptide. (d) LCMV load determined by plaque assay at day 36 post LCMV infection. The limit of detection is indicated by the line (n.d.: not detectable). Results are pooled from four independent experiments with n=9-16 mice/group. Statistical comparisons are depicted with asterisks. \* $p$ =0.05; \*\* $p$ <0.01; \*\*\*\* $p$ <0.001 (One-way ANOVA). (a) was created with BioRender.com.

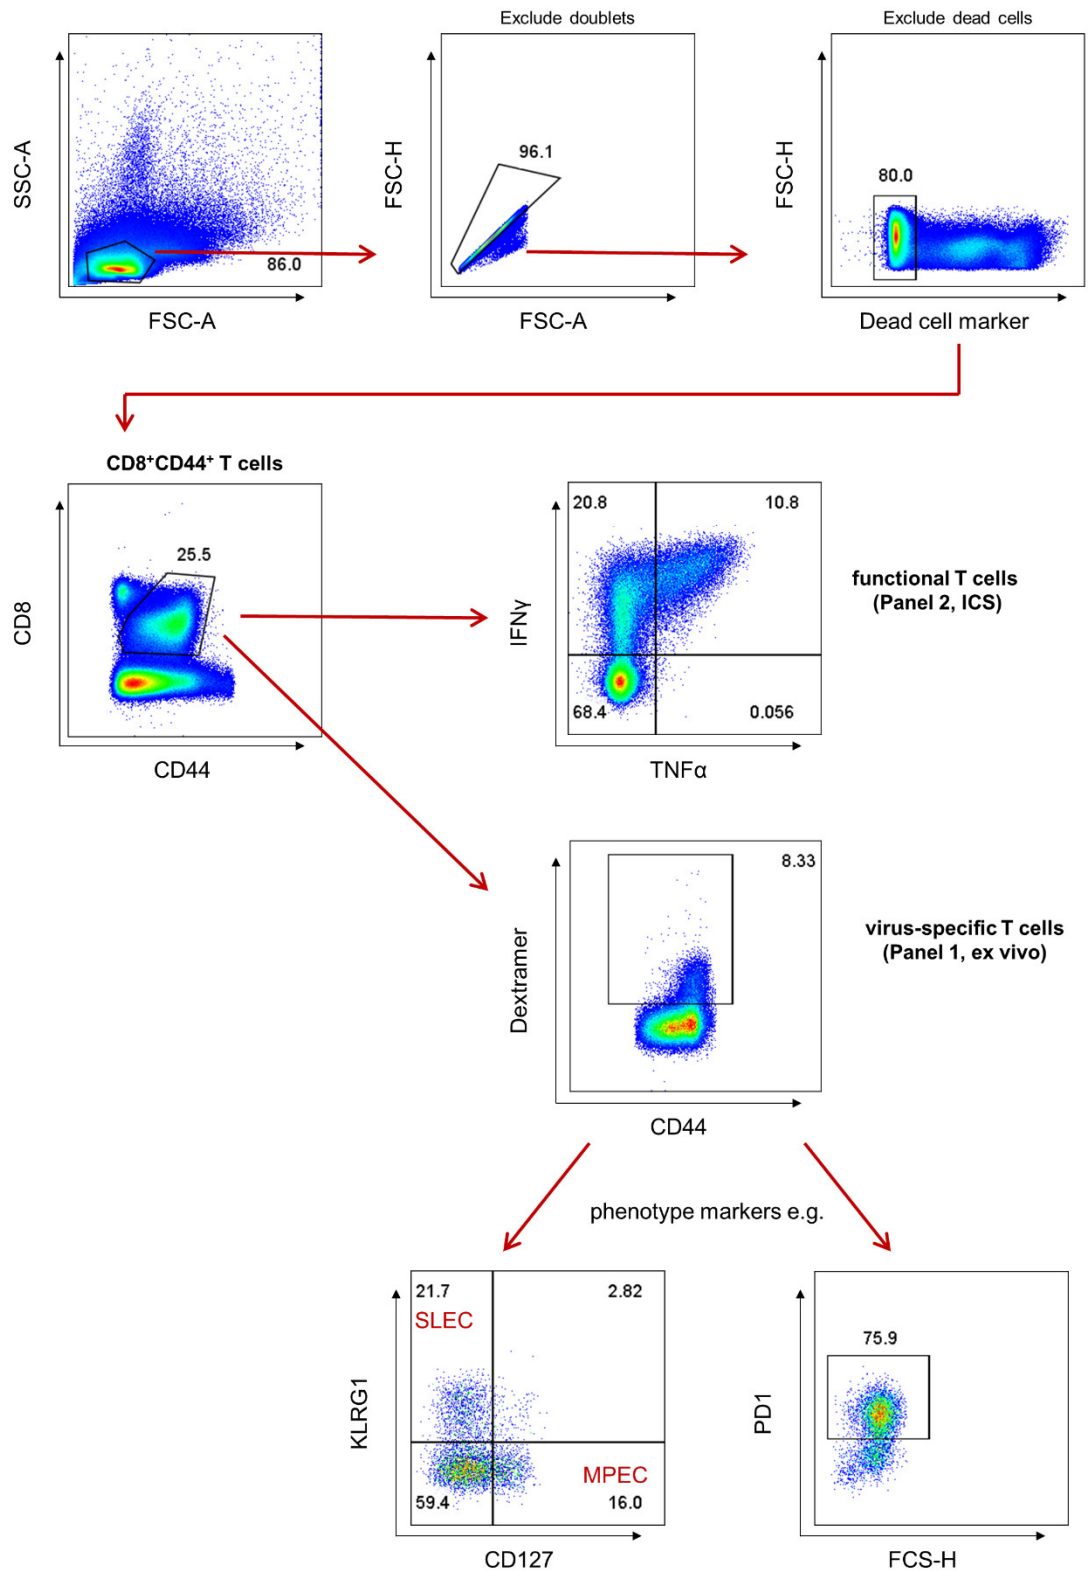

**Figure S2.** Gating strategy. This strategy was used to identify functional CD8<sup>+</sup> CD44<sup>+</sup> T cells, identified by IFN $\gamma$  and TNF $\alpha$ , after in vitro restimulation. Virus-specific CD8<sup>+</sup> CD44<sup>+</sup> T cells were further phenotypically characterized ex vivo, e.g. SLEC: short lived effector T cells (CD127-KLRG1<sup>+</sup>), MPEC: memory precursor T cells (KLRG1-CD127<sup>+</sup>) and PD1 staining.

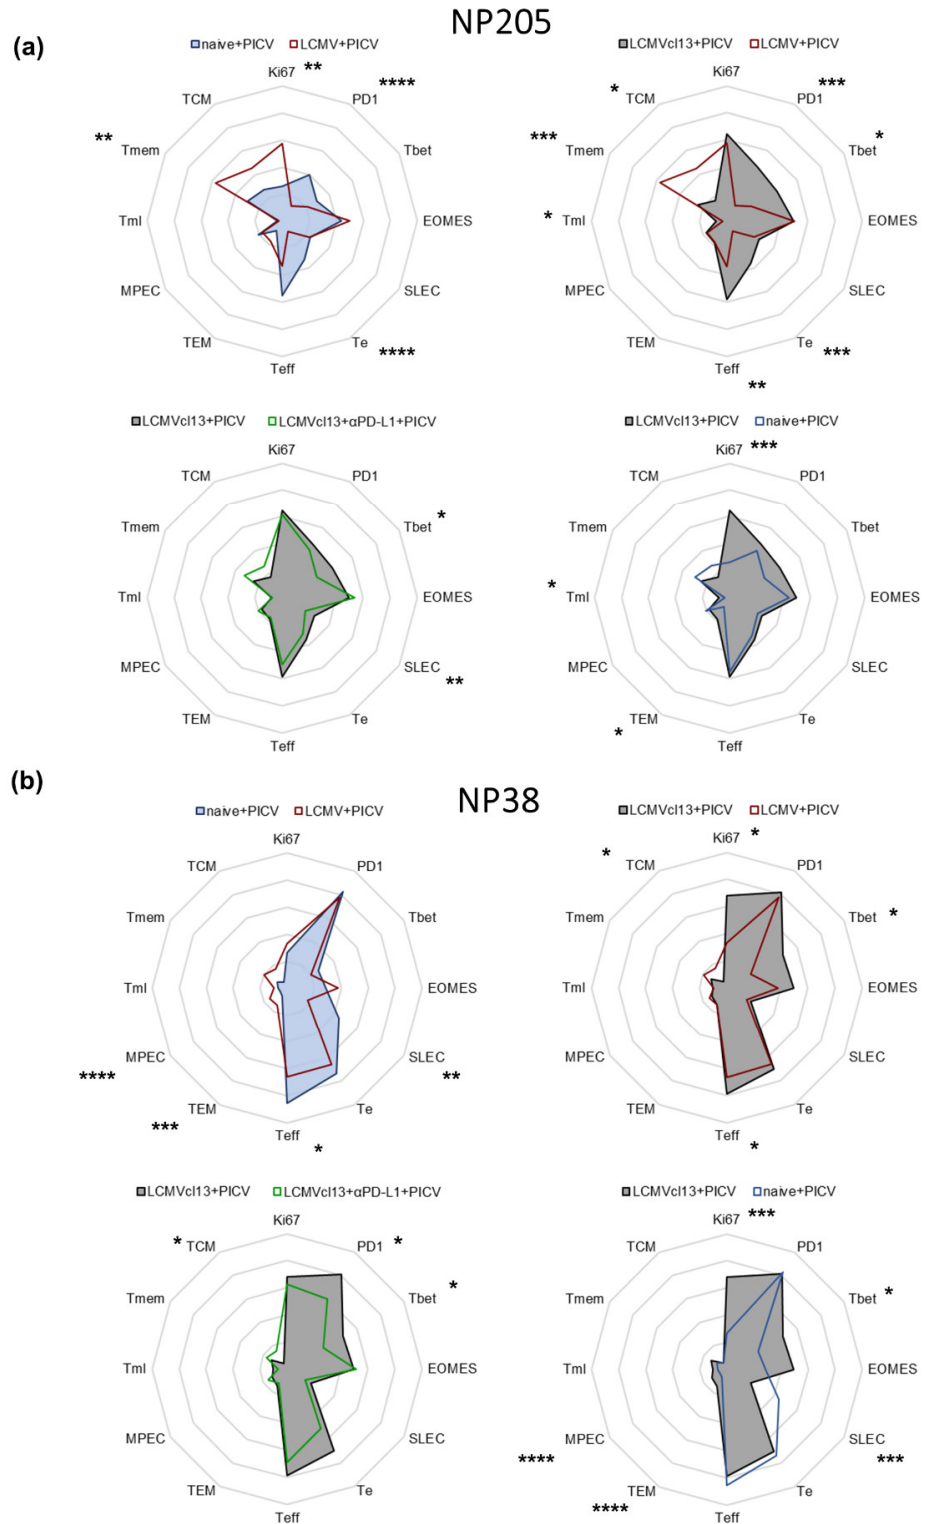

**Figure S3.** Phenotypical comparison of different groups from cross-reactive and non-cross-reactive T cells. Radar plots depicting the mean percentage of a) NP205- and b) NP38-Dextramer<sup>+</sup> CD8<sup>+</sup> T cells. Statistical comparisons are depicted with asterisks. \* $p=0.05$ ; \*\* $p<0.01$ ; \*\*\* $p<0.001$ ; \*\*\*\* $p<0.001$  (Student t-test comparison). Results are pooled from four independent experiments with  $n=6-11$  mice/group. Each line indicates 20 % frequency increase from zero (center point) to 100 % (most outer ring). SLEC: short lived effector T cells (CD127<sup>+</sup>KLRLG1<sup>+</sup>), T<sub>e</sub>: effector/terminally exhausted T cells (PD1<sup>+</sup>CD127<sup>+</sup>), T<sub>eff</sub>: effector T cells (CD62L<sup>+</sup>CD127<sup>+</sup>), T<sub>EM</sub>: effector-memory T cells (CD62L<sup>+</sup>CD127<sup>+</sup>), MPEC: memory precursor T cells (KLRLG1<sup>+</sup>CD127<sup>+</sup>), T<sub>ml</sub>: memory-like T cells (PD1<sup>+</sup>CD127<sup>+</sup>), T<sub>mem</sub>: memory T cells (PD1<sup>+</sup>CD127<sup>+</sup>), T<sub>CM</sub>: central memory T cells (CD62L<sup>+</sup>CD127<sup>+</sup>).
